# Supplementary material
Source: ML conference proceedings conference paper supplement (https://proceedings.neurips.cc/paper_files/paper/2019/hash/3557a86db669836730d946052d988e46-Abstract.html)
Supplement: Supplementary file [file 3557a86db669836730d946052d988e46-Supplemental.zip]

## Supplementary Material

### A Omitted Results from Section 2

#### A.1 Warm-Up: Basic Algorithm

In this subsection, we present a basic algorithm that achieves  $\alpha = 1$  and whose runtime is  $\text{poly}(d)2^{\tilde{O}(1/(\epsilon\gamma^2))}$ . Despite its slow runtime, this algorithm serves as a warm-up for our more sophisticated constant factor approximation algorithm in the next subsection.

We start by establishing a basic structural property of this setting which motivates our basic algorithm. We start with the following simple claim:

**Claim A.1.** *Let  $\mathbf{M}^{\mathcal{D}} = \mathbf{E}_{(\mathbf{x}, y) \sim \mathcal{D}}[\mathbf{x}\mathbf{x}^T]$  and  $\mathbf{w}^*$  be a unit vector such that  $\text{err}_{\gamma}^{\mathcal{D}}(\mathbf{w}^*) \leq \text{OPT}_{\gamma}^{\mathcal{D}} \leq 1/2$ . Then,  $\|\mathbf{M}^{\mathcal{D}}\|_2 \geq \mathbf{w}^{*T} \mathbf{M}^{\mathcal{D}} \mathbf{w}^* \geq \gamma^2/2$ .*

*Proof.* By assumption,  $\Pr_{(\mathbf{x}, y) \sim \mathcal{D}}[|\langle \mathbf{w}^*, \mathbf{x} \rangle| \geq \gamma] \geq 1/2$ , which implies that  $\mathbf{E}_{(\mathbf{x}, y) \sim \mathcal{D}}[(\langle \mathbf{w}^*, \mathbf{x} \rangle)^2] \geq \gamma^2/2$ . The claim follows from the fact that  $\mathbf{v}^T \mathbf{M}^{\mathcal{D}} \mathbf{v} = \mathbf{E}_{(\mathbf{x}, y) \sim \mathcal{D}}[(\langle \mathbf{v}, \mathbf{x} \rangle)^2]$ , for any  $\mathbf{v} \in \mathbb{R}^d$ , and the definition of the spectral norm.  $\square$

Claim A.1 allows us to obtain an approximation to the optimal halfspace by projecting on the space of large eigenvalues of  $\mathbf{M}^{\mathcal{D}}$ . We will need the following terminology: For  $\delta > 0$ , let  $V_{\geq \delta}^{\mathcal{D}}$  be the space spanned by the eigenvalues of  $\mathbf{M}^{\mathcal{D}}$  with magnitude at least  $\delta$  and  $V_{< \delta}^{\mathcal{D}}$  be its complement. Let  $\text{Proj}_V(\mathbf{v})$  denote the projection operator of vector  $\mathbf{v}$  on subspace  $V$ . Then, we have the following:

**Lemma A.2.** *Let  $\delta > 0$  and  $\mathbf{w}' = \text{Proj}_{V_{\geq \delta}^{\mathcal{D}}}(\mathbf{w}^*)$ . Then,  $\text{err}_{\gamma/2}^{\mathcal{D}}(\mathbf{w}') \leq \text{err}_{\gamma}^{\mathcal{D}}(\mathbf{w}^*) + 4\delta/\gamma^2$ .*

*Proof.* Let  $\mathbf{w}^* = \mathbf{w}' + \mathbf{w}''$ , where  $\mathbf{w}'' = \text{Proj}_{V_{< \delta}^{\mathcal{D}}}(\mathbf{w}^*)$ . Observe that for any  $(\mathbf{x}, y)$ , if  $y\langle \mathbf{w}', \mathbf{x} \rangle \leq \gamma/2$  then  $y\langle \mathbf{w}^*, \mathbf{x} \rangle \leq \gamma$ , unless  $|\langle \mathbf{w}'', \mathbf{x} \rangle| \geq \gamma/2$ . Hence,  $\text{err}_{\gamma/2}^{\mathcal{D}}(\mathbf{w}') \leq \text{err}_{\gamma}^{\mathcal{D}}(\mathbf{w}^*) + \Pr_{(\mathbf{x}, y) \sim \mathcal{D}}[|\langle \mathbf{w}'', \mathbf{x} \rangle| \geq \gamma/2]$ . By definition of  $\mathbf{w}''$  and  $\mathbf{M}^{\mathcal{D}}$ , we have that  $\mathbf{E}_{(\mathbf{x}, y) \sim \mathcal{D}}[(\langle \mathbf{w}'', \mathbf{x} \rangle)^2] \leq \delta$ . By Markov's inequality, we thus obtain  $\Pr_{(\mathbf{x}, y) \sim \mathcal{D}}[(\langle \mathbf{w}'', \mathbf{x} \rangle)^2 \geq \gamma^2/4] \leq 4\delta/\gamma^2$ , completing the proof of the lemma.  $\square$

Motivated by Lemma A.2, the idea is to enumerate over  $V_{\geq \delta}^{\mathcal{D}}$ , for  $\delta = \Theta(\epsilon\gamma^2)$ , and output a vector  $\mathbf{v}$  with smallest empirical  $\gamma/2$ -margin error. To turn this into an actual algorithm, we work with a finite sample set and enumerate over an appropriate cover of the space  $V_{\geq \delta}^{\mathcal{D}}$ . The pseudocode is as follows:

---

#### Algorithm 2 Basic 1-Agnostic Proper Learning Algorithm

---

- 1: Draw a multiset  $S = \{(\mathbf{x}^{(i)}, y^{(i)})\}$  of i.i.d. samples from  $\mathcal{D}$ , where  $m = \Omega(\log(1/\tau)/(\epsilon^2\gamma^2))$ .
  - 2: Let  $\hat{\mathcal{D}}_m$  be the empirical distribution on  $S$ .
  - 3: Let  $\mathbf{M}^{\hat{\mathcal{D}}_m} = \mathbf{E}_{(\mathbf{x}, y) \sim \hat{\mathcal{D}}_m}[\mathbf{x}\mathbf{x}^T]$ .
  - 4: Set  $\delta = \epsilon\gamma^2/16$ . Use SVD to find a basis of  $V_{\geq \delta}^{\hat{\mathcal{D}}_m}$ .
  - 5: Compute a  $\delta/2$ -cover,  $C_{\delta/2}$ , in  $\ell_2$ -norm, of  $V_{\geq \delta}^{\hat{\mathcal{D}}_m} \cap \mathbb{S}_{d-1}$ .
  - 6: Let  $\mathbf{v} \in \arg\min_{\mathbf{w} \in C_{\delta/2}} \text{err}_{\gamma/4}^{\hat{\mathcal{D}}_m}(\mathbf{w})$ .
  - 7: **return**  $h_{\mathbf{v}}(\mathbf{x}) = \text{sign}(\langle \mathbf{v}, \mathbf{x} \rangle)$ .
- 

First, we analyze the runtime of our algorithm. The SVD of  $\mathbf{M}^{\hat{\mathcal{D}}_m}$  can be computed in  $\text{poly}(d/\delta)$  time. Note that  $V_{\geq \delta}^{\hat{\mathcal{D}}_m}$  has dimension at most  $1/\delta$ . This follows from the fact that  $\mathbf{M}^{\hat{\mathcal{D}}_m}$  is PSD and its trace is  $\sum_{i=1}^d \lambda_i = \text{tr}(\mathbf{M}^{\hat{\mathcal{D}}_m}) = \mathbf{E}_{(\mathbf{x}, y) \sim \hat{\mathcal{D}}_m}[\text{tr}(\mathbf{x}\mathbf{x}^T)] \leq 1$ , where we used that  $\|\mathbf{x}\|_2 \leq 1$  with probability 1 over  $\hat{\mathcal{D}}_m$ . Therefore, the unit sphere of  $V_{\geq \delta}^{\hat{\mathcal{D}}_m}$  has a  $\delta/2$ -cover  $C_{\delta/2}$  of size  $(2/\delta)^{O(1/\delta)} = 2^{\tilde{O}(1/(\epsilon\gamma^2))}$  that can be computed in output polynomial time.

We now prove correctness. The main idea is to apply Lemma A.2 for the empirical distribution  $\widehat{\mathcal{D}}_m$  combined with Fact 2.4. We proceed with the formal proof: First, we claim that for  $m = \Omega(\log(1/\tau)/\epsilon^2)$ , with probability at least  $1 - \tau/2$  over  $S$ , we have that  $\text{err}_{\gamma}^{\widehat{\mathcal{D}}_m}(\mathbf{w}^*) \leq \text{err}_{\gamma}^{\mathcal{D}}(\mathbf{w}^*) + \epsilon/8$ . To see this, note that  $\text{err}_{\gamma}^{\widehat{\mathcal{D}}_m}(\mathbf{w}^*)$  can be viewed as a sum of Bernoulli random variables with expectation  $\text{err}_{\gamma}^{\mathcal{D}}(\mathbf{w}^*)$ . Hence, the claim follows by a Chernoff bound. By an argument similar to that of Lemma A.2, we have that  $\text{err}_{\gamma/4}^{\widehat{\mathcal{D}}_m}(\mathbf{v}) \leq \text{err}_{\gamma/2}^{\widehat{\mathcal{D}}_m}(\mathbf{w}') + \epsilon/2$ . Indeed, we can write  $\mathbf{v} = \mathbf{w}' + \mathbf{r}$ , where  $\|\mathbf{r}\|_2 \leq \delta/2$ , and follow the same argument.

In summary, we have the following sequence of inequalities:

$$\begin{aligned} \text{err}_{\gamma/4}^{\widehat{\mathcal{D}}_m}(\mathbf{v}) &\leq \text{err}_{\gamma/2}^{\widehat{\mathcal{D}}_m}(\mathbf{w}') + \epsilon/2 \leq \text{err}_{\gamma}^{\widehat{\mathcal{D}}_m}(\mathbf{w}^*) + \epsilon/2 + \epsilon/4 \\ &\leq \text{err}_{\gamma}^{\mathcal{D}}(\mathbf{w}^*) + \epsilon/2 + \epsilon/4 + \epsilon/8, \end{aligned}$$

where the second inequality uses Lemma A.2 for  $\widehat{\mathcal{D}}_m$ . Finally, we use Fact 2.4 for  $\gamma/4$  and  $\epsilon/8$  to obtain that  $\text{err}_{0-1}^{\mathcal{D}}(h_{\mathbf{v}}) \leq \text{err}_{\gamma/4}^{\widehat{\mathcal{D}}_m}(\mathbf{v}) + \epsilon/8 \leq \text{OPT}_{\gamma}^{\mathcal{D}} + \epsilon$ . The proof follows by a union bound.

## A.2 Algorithm for $\alpha$ -Agnostic Learning

In this section, we show that if one wishes to obtain an  $\alpha$ -agnostic learner for some large  $\alpha \gg 1$ , one can obtain runtime exponential in  $1/(\alpha\gamma)^2$  rather than  $1/\gamma^2$ . Formally we prove:

**Theorem A.3.** *There is an algorithm that uses  $\tilde{O}(1/(\epsilon^2\gamma^2))$  samples, runs in time  $\text{poly}(d) \cdot (1/\epsilon)^{\tilde{O}(1/(\alpha\gamma)^2)}$  and is a  $\alpha$ -agnostic proper learner for  $\gamma$ -margin halfspaces with probability  $9/10$ .*

Let  $\mathcal{D}$  be a distribution over  $\mathbb{B}^d \times \{-1, 1\}$ . Suppose that there exists a unit vector  $\mathbf{w}^* \in \mathbb{R}^d$  such that  $\Pr_{(\mathbf{x}, y) \sim \mathcal{D}}[y\langle \mathbf{w}^*, \mathbf{x} \rangle \geq \gamma] \geq 1 - \text{OPT}_{\gamma}^{\mathcal{D}}$  for some  $\text{OPT}_{\gamma}^{\mathcal{D}} > 0$ . Suppose additionally that  $\gamma, \epsilon > 0$  and  $\alpha > 1$ . We will give an algorithm that given sample access to  $\mathcal{D}$  along with  $\gamma, \alpha, \epsilon, \text{OPT}_{\gamma}^{\mathcal{D}}$ , draws  $O(\log(\alpha/\epsilon)/(\gamma\epsilon)^2)$  samples, runs in time  $\text{poly}(d)(1/\gamma\epsilon)^{\tilde{O}(1/(\alpha\gamma)^2)}$  and with probability at least  $9/10$  returns a  $\mathbf{w}$  with  $\Pr_{(\mathbf{x}, y) \sim \mathcal{D}}[\text{sign}(\langle \mathbf{w}, \mathbf{x} \rangle) \neq y] < O(\alpha \cdot \text{OPT}_{\gamma}^{\mathcal{D}} + \epsilon)$ .

We begin by providing an algorithm that works if the distribution  $\mathcal{D}$  is given explicitly. We will be able to reduce to this case by using the empirical distribution over a sufficiently large set of samples.

**Proposition A.4.** *Let  $\mathcal{D}$  be an explicit distribution over  $\mathbb{B}^d \times \{-1, 1\}$ . Suppose that there exists a unit vector  $\mathbf{w}^*$  so that  $\Pr_{(\mathbf{x}, y) \sim \mathcal{D}}[y\langle \mathbf{w}^*, \mathbf{x} \rangle \geq \gamma] \geq 1 - \text{OPT}_{\gamma}^{\mathcal{D}}$  for some  $\text{OPT}_{\gamma}^{\mathcal{D}} > 0$ . Suppose additionally that  $\gamma, \epsilon > 0$  and  $\alpha > 1$ . There exists an algorithm that given  $\mathcal{D}$  along with  $\gamma, \alpha, \epsilon, \text{OPT}_{\gamma}^{\mathcal{D}}$ , runs in time  $\text{poly}(d)(|\text{supp}(\mathcal{D})|/(\alpha\gamma \cdot \text{OPT}_{\gamma}^{\mathcal{D}}))^{\tilde{O}(1/(\alpha\gamma)^2)}$  and returns a  $\mathbf{w}$  with  $\Pr_{(\mathbf{x}, y) \sim \mathcal{D}}[\text{sign}(\langle \mathbf{w}, \mathbf{x} \rangle) \neq y] < O(\alpha \cdot \text{OPT}_{\gamma}^{\mathcal{D}} + \epsilon)$ .*

Our main technical tool here will be the vector of Chow parameters [Cho61, OS08, DDFS14]:

**Definition A.5.** Given a boolean function  $f : \mathbb{B}^d \rightarrow \{\pm 1\}$ , and a distribution  $\mathcal{D}$  on  $\mathbb{B}^d$  the *Chow parameters vector* of  $f$ , is the vector  $\mathbf{Chow}(f)$  given by the expectation  $\mathbf{E}_{\mathbf{x} \sim \mathcal{D}}[f(\mathbf{x})\mathbf{x}]$ .

We note that learning the Chow parameters of the halfspace  $f_{\mathbf{w}^*}(x) = \text{sign}(\langle \mathbf{w}^*, \mathbf{x} \rangle)$  determines the function  $f_{\mathbf{w}^*}$  up to small error. In particular:

**Lemma A.6.** *Let  $g : \mathbb{B}^d \rightarrow \{\pm 1\}$  satisfy  $\Pr_{\mathbf{x} \sim \mathcal{D}}[f_{\mathbf{w}^*}(\mathbf{x}) \neq g(\mathbf{x})] \geq \epsilon$ . Then, we have that  $\|\mathbf{Chow}(f_{\mathbf{w}^*}) - \mathbf{Chow}(g)\|_2 \geq \epsilon\gamma$ .*

*Proof.* We note that

$$\begin{aligned} \|\mathbf{Chow}(f_{\mathbf{w}^*}) - \mathbf{Chow}(g)\|_2 &\geq \langle \mathbf{w}^*, \mathbf{Chow}(f_{\mathbf{w}^*}) - \mathbf{Chow}(g) \rangle \\ &= \mathbf{E}_{\mathbf{x} \sim \mathcal{D}}[\langle \mathbf{w}^*, \mathbf{x} \rangle (f_{\mathbf{w}^*}(\mathbf{x}) - g(\mathbf{x}))] \\ &= \mathbf{E}_{\mathbf{x} \sim \mathcal{D}}[|\langle \mathbf{w}^*, \mathbf{x} \rangle| - g(\mathbf{x})\langle \mathbf{w}^*, \mathbf{x} \rangle] \\ &= 2\mathbf{E}_{\mathbf{x} \sim \mathcal{D}}[|\langle \mathbf{w}^*, \mathbf{x} \rangle| \cdot \mathbf{1}_{f_{\mathbf{w}^*}(\mathbf{x}) \neq g(\mathbf{x})}]. \end{aligned}$$

However, there is at least an  $\epsilon$  probability that  $f(\mathbf{x}) \neq g(\mathbf{x})$  and  $y\langle \mathbf{w}^*, \mathbf{x} \rangle \geq \gamma$ , which implies that  $|\langle \mathbf{w}^*, \mathbf{x} \rangle| \geq \gamma$ . Therefore, this expectation is at least  $\epsilon\gamma$ .  $\square$

Lemma A.6, combined with the gradient descent type algorithm in [DDFS14], implies that learning an approximation to  $\mathbf{Chow}(f_{\mathbf{w}^*})$  is sufficient to learn a good hypothesis.

**Lemma A.7** ([DDFS14]). *There is a polynomial time algorithm that given an explicit distribution  $\mathcal{D}$  and a vector  $\mathbf{c}$  with  $\|\mathbf{Chow}(f_{\mathbf{w}^*}) - \mathbf{c}\|_2 \leq \epsilon\gamma$ , returns a  $\mathbf{w}$  so that  $\Pr_{(\mathbf{x}, y) \sim \mathcal{D}}[\text{sign}(\langle \mathbf{w}, \mathbf{x} \rangle) \neq \text{sign}(\langle \mathbf{w}^*, \mathbf{x} \rangle)] \leq \epsilon + \text{OPT}_\gamma^\mathcal{D}$ . In particular, for this  $\mathbf{w}$  we have that  $\Pr_{(\mathbf{x}, y) \sim \mathcal{D}}[\text{sign}(\langle \mathbf{w}, \mathbf{x} \rangle) \neq y] = O(\epsilon + \text{OPT}_\gamma^\mathcal{D})$ .*

Thus, it will suffice to approximate the Chow parameters of  $f_{\mathbf{w}^*}$  to error  $\alpha\gamma \cdot \text{OPT}_\gamma^\mathcal{D}$ . One might consider using the empirical Chow parameters, namely  $P = \mathbf{E}_{(\mathbf{x}, y) \sim \mathcal{D}}[y\mathbf{x}]$  for this purpose. In the realizable case, this would be the right thing to do, but we are working in the agnostic setting. We note that since  $y = \text{sign}(\langle \mathbf{w}^*, \mathbf{x} \rangle)$  for all but an  $\text{OPT}_\gamma^\mathcal{D}$ -fraction of  $\mathbf{x}$ , and since the  $\mathbf{x}$  are vectors in the unit ball, the error has  $\ell_2$ -norm at most  $\text{OPT}_\gamma^\mathcal{D}$ . In fact, if we have some vector  $\mathbf{w}$  so that  $\langle \mathbf{w}, P - \mathbf{Chow}(f_{\mathbf{w}^*}) \rangle \geq \alpha\gamma \cdot \text{OPT}_\gamma^\mathcal{D}$ , then there must be some  $(\mathbf{x}, y)$  in the domain of  $\mathcal{D}$  with  $|\langle \mathbf{x}, \mathbf{w} \rangle| \geq \alpha\gamma$ . The idea is to guess this  $\mathbf{w}$  and then guess the true projection of  $\mathbf{Chow}(f_{\mathbf{w}^*})$  onto  $\mathbf{w}$ .

We present the pseudo-code for the algorithm establishing Proposition A.4 as Algorithm 3 below.

---

**Algorithm 3**  $\alpha$ -Agnostic Proper Learner of Proposition A.4

---

```

1: Let  $m$  be a sufficiently large multiple of  $\log(1/\alpha\gamma)/(\alpha\gamma)^2$ .
2: Let  $P = \mathbf{E}_{(\mathbf{x}, y) \sim \mathcal{D}}[y\mathbf{x}]$ 
3: for every sequence  $\mathbf{x}^{(1)}, \dots, \mathbf{x}^{(m)}$  from  $\mathcal{D}$  do
4:   Let  $V$  be the span of  $\mathbf{x}^{(1)}, \dots, \mathbf{x}^{(m)}$ .
5:   Let  $\mathcal{C}$  be a  $(\alpha\gamma \cdot \text{OPT}_\gamma^\mathcal{D})$ -cover of the unit ball of  $V$ .
6:   for each  $g \in \mathcal{C}$  do
7:     Let  $P'$  be obtained by replacing the projection of  $P$  onto  $V$  with  $g$ . In particular,
        $P' = P - \text{Proj}_V(P) + g$ .
8:     Run Lemma A.7 to find a hypothesis  $\mathbf{w}$ .
9:   end for
10: end for
11: return The hypothesis that produces smallest empirical error among all  $\mathbf{w}$ 's in Line 8.

```

---

464

*Proof of Proposition A.4.* Firstly, note that the runtime of this algorithm is clearly  $\text{poly}(d) \left( \frac{|\mathcal{D}|}{\text{OPT}_\gamma^\mathcal{D} \alpha\gamma} \right)^{\tilde{O}(1/(\alpha\gamma)^2)}$ . It remains to show correctness. We note that by Lemma A.7 it suffices to show that some  $P'$  is within  $O(\alpha\gamma \cdot \text{OPT}_\gamma^\mathcal{D})$  of  $\mathbf{Chow}(f_{\mathbf{w}^*})$ . For this it suffices to show that there is a sequence  $\mathbf{x}^{(1)}, \dots, \mathbf{x}^{(m)}$  so that  $\|\text{Proj}_{V^\perp}(\mathbf{Chow}(f_{\mathbf{w}^*}) - P)\|_2 = O(\alpha\gamma \text{OPT}_\gamma^\mathcal{D})$ .

To show this, let  $V_i$  be the span of  $\mathbf{x}^{(1)}, \mathbf{x}^{(2)}, \dots, \mathbf{x}^{(i)}$ . We claim that if  $\|\text{Proj}_{V_i^\perp}(\mathbf{Chow}(f_{\mathbf{w}^*}) - P)\|_2 \gg \alpha\gamma \cdot \text{OPT}_\gamma^\mathcal{D}$ , then there exists an  $\mathbf{x}^{(i+1)}$  in the support of  $\mathcal{D}$  so that

$$\|\text{Proj}_{V_{i+1}^\perp}(\mathbf{Chow}(f_{\mathbf{w}^*}) - P)\|_2^2 = \|\text{Proj}_{V_i^\perp}(\mathbf{Chow}(f_{\mathbf{w}^*}) - P)\|_2^2 (1 - \Omega(\alpha\gamma)^2).$$

To show this, we let  $\mathbf{w}$  be the unit vector in the direction of  $\text{Proj}_{V_i^\perp}(\mathbf{Chow}(f_{\mathbf{w}^*}) - P)$ . We note that

$$\|\text{Proj}_{V_i^\perp}(\mathbf{Chow}(f_{\mathbf{w}^*}) - P)\|_2 = \langle \mathbf{w}, \mathbf{Chow}(f_{\mathbf{w}^*}) - P \rangle = \mathbf{E}_{(\mathbf{x}, y) \sim \mathcal{D}}[\langle \mathbf{w}, \mathbf{x} \rangle (\text{sign}(\langle \mathbf{w}^*, \mathbf{x} \rangle) - y)].$$

Since  $\text{sign}(\langle \mathbf{w}^*, \mathbf{x} \rangle) - y$  is 0 for all but an  $\text{OPT}_\gamma^\mathcal{D}$ -fraction of  $(\mathbf{x}, y)$ , we have that there must be some  $\mathbf{x}^{(i+1)}$  so that  $\langle \mathbf{x}^{(i+1)}, \mathbf{w} \rangle \gg \|\text{Proj}_{V_i^\perp}(\mathbf{Chow}(f_{\mathbf{w}^*}) - P)\|_2 / \text{OPT}_\gamma^\mathcal{D} \gg \alpha\gamma$ . If we chose this  $\mathbf{x}^{(i+1)}$ , we have that

$$\begin{aligned} \|\text{Proj}_{V_{i+1}^\perp}(\mathbf{Chow}(f_{\mathbf{w}^*}) - P)\|_2^2 &\leq \|\text{Proj}_{V_i^\perp}(\mathbf{Chow}(f_{\mathbf{w}^*}) - P)\|_2^2 - \langle \mathbf{x}^{(i+1)}, \mathbf{Chow}(f_{\mathbf{w}^*}) - P \rangle^2 \\ &= \|\text{Proj}_{V_i^\perp}(\mathbf{Chow}(f_{\mathbf{w}^*}) - P)\|_2^2 (1 - \langle \mathbf{x}^{(i+1)}, \mathbf{w} \rangle^2) \\ &= \|\text{Proj}_{V_i^\perp}(\mathbf{Chow}(f_{\mathbf{w}^*}) - P)\|_2^2 (1 - \Omega(\alpha\gamma)^2). \end{aligned}$$

Therefore, unless some  $\|\text{Proj}_{V_i^\perp}(\mathbf{Chow}(f_{\mathbf{w}^*}) - P)\|_2^2 = O(\alpha\gamma \cdot \text{OPT}_\gamma^{\mathcal{D}})$ , we have that

$$\begin{aligned} \|\text{Proj}_{V_m^\perp}(\mathbf{Chow}(f_{\mathbf{w}^*}) - P)\|_2^2 &= \|P - \mathbf{Chow}(f_{\mathbf{w}^*})\|_2^2 \exp(-\Omega(m(\alpha\gamma)^2)) \\ &\leq \text{OPT}_\gamma^{\mathcal{D}} \exp(\log(\alpha\gamma)) = \text{OPT}_\gamma^{\mathcal{D}} \alpha\gamma. \end{aligned}$$

So in either case, we have some sequence of  $\mathbf{x}$ s so that the projection onto  $V^\perp$  of  $\mathbf{Chow}(f_{\mathbf{w}^*}) - P$  is sufficiently small. This completes our analysis.  $\square$

In order to extend this to a proof of Theorem A.3, we will need to reduce to solving the problem on a finite sample set. This result can be obtained from Proposition A.4 by some fairly simple reductions.

Firstly, we note that we can assume that  $\text{OPT}_\gamma^{\mathcal{D}} \geq \epsilon/\alpha$ , as increasing it to this value does not change the problem.

Secondly, we note that if we let  $\widehat{\mathcal{D}}$  be the empirical distribution over a set of  $\Omega(d/\epsilon^2)$  random samples, then with at least  $2/3$  probability we have that

- $\Pr_{(\mathbf{x}, y) \sim \widehat{\mathcal{D}}} [y \langle \mathbf{w}^*, \mathbf{x} \rangle \geq \gamma] \geq 1 - O(\text{OPT}_\gamma^{\mathcal{D}})$
- For any vector  $\mathbf{w}$ ,  $\Pr_{(\mathbf{x}, y) \sim \mathcal{D}} [\text{sign}(\langle \mathbf{w}, \mathbf{x} \rangle) \neq y] = \Pr_{(\mathbf{x}, y) \sim \widehat{\mathcal{D}}} [\text{sign}(\langle \mathbf{w}, \mathbf{x} \rangle) \neq y] + O(\epsilon)$ .

The first statement here is by applying the Markov inequality to the probability that  $y \langle \mathbf{w}^*, \mathbf{x} \rangle < \gamma$ , and the second is by the VC-inequality [DL01]. We note that if the above hold, applying the algorithm from Proposition A.4 to  $\widehat{\mathcal{D}}$  will produce an appropriate  $\mathbf{w}$ . This produces an algorithm that uses  $O(d/\epsilon^2)$  samples and has runtime  $O(d/\gamma\epsilon)^{\tilde{O}(1/(\alpha\gamma)^2)}$ .

Unfortunately, this algorithm is not quite satisfactory as the runtime and sample complexity scale poorly with the dimension  $d$ . In order to fix this, we will make use of an idea from [KS04]. Namely, we will first apply dimension reduction to a smaller number of dimensions before applying our algorithm. In particular, we will make use of the Johnson-Lindenstrauss lemma:

**Lemma A.8** ([JL84]). *There exists a probability distribution over linear transformations  $A : \mathbb{R}^d \rightarrow \mathbb{R}^m$  with  $m = O(\log(1/\delta)/\epsilon^2)$  so that for any unit vectors  $\mathbf{v}, \mathbf{w} \in \mathbb{R}^d$ ,  $\Pr_A[|\langle \mathbf{v}, \mathbf{w} \rangle - \langle A\mathbf{v}, A\mathbf{w} \rangle| > \epsilon] < \delta$ . Additionally, there are efficient algorithms to sample from such distributions over  $A$ .*

We note that this implies in particular that  $\|A\mathbf{v}\|_2 = 1 \pm \epsilon$  except for with probability  $\delta$ . Thus, by tweaking the parameters a little bit and letting  $h_A(\mathbf{v}) = A\mathbf{v}/\|A\mathbf{v}\|_2$ , we have that  $h_A(\mathbf{v})$  is always a unit vector and that  $\langle h_A(\mathbf{v}), h_A(\mathbf{w}) \rangle = \langle \mathbf{v}, \mathbf{w} \rangle \pm \epsilon$  except with probability  $\delta$ .

Next, we note that by taking  $\epsilon = \gamma/2$  and  $\delta = \text{OPT}_\gamma^{\mathcal{D}}$  in the above we have that

$$\begin{aligned} &\Pr_{A, (\mathbf{x}, y) \sim \mathcal{D}} [y \langle h_A(\mathbf{w}^*), h_A(\mathbf{x}) \rangle < \gamma/2] \\ &\leq \Pr_{(\mathbf{x}, y) \sim \mathcal{D}} [y \langle \mathbf{w}^*, \mathbf{x} \rangle < \gamma] + \Pr_{A, (\mathbf{x}, y) \sim \mathcal{D}} [|\langle h_A(\mathbf{w}^*), h_A(\mathbf{x}) \rangle - \langle \mathbf{w}^*, \mathbf{x} \rangle| > \gamma/2] \\ &= O(\text{OPT}_\gamma^{\mathcal{D}}). \end{aligned}$$

Thus, by the Markov inequality, with large constant probability over  $A$  we have that

$$\Pr_{(\mathbf{x}, y) \sim \mathcal{D}} [y \langle h_A(\mathbf{w}^*), h_A(\mathbf{x}) \rangle < \gamma/2] = O(\text{OPT}_\gamma^{\mathcal{D}}).$$

But this means that the distribution  $(h_A(\mathbf{x}), y)$  satisfies the assumptions for our algorithm (with  $\gamma$  replaced by  $\gamma/2$  and  $\text{OPT}_\gamma^{\mathcal{D}}$  by  $O(\text{OPT}_\gamma^{\mathcal{D}})$ ), but in dimension  $m = O(\log(\alpha/\epsilon)/\gamma^2)$ . Running the algorithm described above on this set will find us a vector  $\mathbf{w}$  so that

$$\Pr_{(\mathbf{x}, y) \sim \mathcal{D}} [\text{sign}(\langle \mathbf{w}, h_A(\mathbf{x}) \rangle) \neq y] = O(\alpha \text{OPT}_\gamma^{\mathcal{D}} + \epsilon).$$

However, it should be noted that

$$\text{sign}(\langle \mathbf{w}, h_A(\mathbf{x}) \rangle) = \text{sign}(\langle \mathbf{w}, A\mathbf{x} \rangle / \|A\mathbf{x}\|_2) = \text{sign}(\langle \mathbf{w}, A\mathbf{x} \rangle) = \text{sign}(A^T \langle \mathbf{w}, \mathbf{x} \rangle).$$

Thus,  $A^T \mathbf{w}$  satisfies the necessary conditions.

Our final algorithm is given below:

---

**Algorithm 4**  $\alpha$ -Agnostic Proper Learning of Theorem A.3

---

- 1: Pick  $A : \mathbb{R}^d \rightarrow \mathbb{R}^m$  with  $m = O(\log(\alpha/\epsilon)/\gamma^2)$  from an appropriate Johnson-Lindenstrauss family and define  $f_A$  appropriately.
  - 2: Take  $O(m/\epsilon^2)$  random samples and let  $\widehat{\mathcal{D}}$  be the uniform distribution over  $(Ax/\|Ax\|_2, y)$  for samples  $(\mathbf{x}, y)$  from this set.
  - 3: Run the algorithm from Proposition A.4 on  $\widehat{\mathcal{D}}$  using  $\gamma/2$  instead of  $\gamma$  to find a vector  $\mathbf{w}$ .
  - 4: **return**  $A^T \mathbf{w}$ .
- 

## B Omitted Results from Section 3

### B.1 Lower Bounds with Stronger Quantifiers on Parameters

Before we proceed to our proofs, let us first state a running time lower bound with stronger quantifier. Recall that previously we only rule out algorithms that work *for all* combinations of  $d, \gamma, \epsilon$ . Below we relax the quantifier so that we need the *for all* quantifier only for  $d$ .

**Lemma B.1.** *Assuming the (randomized) ETH, for any universal constant  $\alpha \geq 1$ , there exists  $\epsilon_0 = \epsilon_0(\alpha)$  such that there is no  $\alpha$ -agnostic learner for  $\gamma$ -margin halfspaces that runs in time  $O(2^{(1/\gamma)^{2-o(1)}}) \text{poly}(d)$  for all  $d$  and for some  $0 < \epsilon < \epsilon_0$  and  $\frac{1}{d^{0.5-o(1)}} \leq \gamma = \gamma(d) \leq \frac{1}{(\log d)^{0.5+o(1)}}$  that satisfies  $\frac{\gamma(d+1)}{\gamma(d)} \geq \Omega(1)$ .*

We remark here that the lower and upper bounds on  $\gamma$  are essentially (i.e., up to lower order terms) the best possible. On the upper bound front, if  $\gamma \geq \tilde{O}\left(\frac{1}{\sqrt{\log d}}\right)$ , then our algorithmic result (Theorem 2.1) already give a  $\text{poly}(d, \frac{1}{\epsilon})$ -time  $\alpha$ -agnostic learner for  $\gamma$ -margin halfspaces (for all constant  $\alpha > 1$ ). On the other hand, if  $\gamma \leq O(\frac{1}{d^{0.5+o(1)}})$ , then the trivial algorithm that exactly solves ERM for  $m = O(\frac{d}{\epsilon^2})$  samples only takes  $2^{O(d/\epsilon^2)}$  time, which is already asymptotically faster than  $2^{(1/\gamma)^{2-o(1)}}$ . The last condition that  $\frac{\gamma(d+1)}{\gamma(d)}$  is not too small is a sanity-check condition that prevents “sudden jumps” in  $\gamma(d)$  such as  $\gamma(d) = \frac{1}{(\log d)^{0.1}}$  and  $\gamma(d+1) = \frac{1}{(d+1)^{0.1}}$ ; note that the condition is satisfied by “typical functions” such as  $\gamma(d) = \frac{1}{d^c}$  or  $\gamma(d) = \frac{1}{(\log d)^c}$  for some constant  $c$ .

As for  $\epsilon$ , we only require the algorithm to work for any  $\epsilon$  that is not *too large*, i.e., no larger than  $\epsilon_0(\alpha)$ . This later number is just a constant (when  $\alpha$  is a constant). We note that it is still an interesting open question to make this requirement as mild as possible; specifically, is it possible to only require the algorithm to work for any  $\epsilon < 1/2$ ?

### B.2 Reduction from $k$ -Clique and Proof of Theorem 3.2

We now proceed to the proofs of our results, starting with Theorem 3.2.

To prove Theorem 3.2, we reduce from the  $k$ -Clique problem. In  $k$ -Clique, we are given a graph  $G$  and an integer  $k$ , and the goal is to determine whether the graph  $G$  contains a  $k$ -clique (as a subgraph).

We take the perspective of *parameterized complexity*. Recall that a parameterized problem with parameter  $k$  is said to be *fixed parameter tractable (FPT)* if it can be solved in time  $f(k)\text{poly}(n)$  for some computable function  $f$ , where  $n$  denotes the input size.

It is well-known that  $k$ -Clique is complete for the class W[1] [DF95]. In other words, under the (widely-believed) assumption that W[1] does not collapse to FPT (the class of fixed parameter tractable problems), we cannot solve  $k$ -Clique in time  $f(k)\text{poly}(n)$  for any computable function  $f$ . We shall not formally define the class W[1] here; interested readers may refer to the book of Downey and Fellows for a much more in-depth discussion of the topic [DF13].

Our reduction starts with an instance of  $k$ -Clique and produces an instance of agnostic learning with margin  $\gamma$  such that  $\gamma = \Omega(1/k)$  (and the dimension is polynomial):

**Lemma B.2.** *There exists a polynomial-time algorithm that takes as input an  $n$ -vertex graph instance  $G$  and an integer  $k$ , and produces a distribution  $\mathcal{D}$  over  $\mathbb{B}_d \times \{\pm 1\}$  and  $\gamma, \kappa \in [0, 1]$  such that*

- 537 • (Completeness) If  $G$  contains a  $k$ -clique, then  $\text{OPT}_\gamma^{\mathcal{D}} \leq \kappa$ .
- 538 • (Soundness) If  $G$  does not contains a  $k$ -clique, then  $\text{OPT}_{0-1}^{\mathcal{D}} > \kappa + \frac{0.001}{n^3}$ .
- 539 • (Margin Parameter)  $\gamma \geq \Omega(\frac{1}{\sqrt{k}})$ .

540 We remark here that, in Lemma B.2 and throughout the remainder of the section, we say that an  
 541 algorithm produces a distribution  $\mathcal{D}$  over  $\mathbb{B}_d \times \{\pm 1\}$  to mean that it outputs the set of samples  
 542  $\{(\mathbf{x}^{(i)}, y^{(i)})\}_{i \in [m]}$  and numbers  $d_i$  for each  $i \in [m]$  representing the probability of  $(\mathbf{x}^{(i)}, y^{(i)})$  with  
 543 respect to  $\mathcal{D}$ . Note that this is stronger than needed since, to prove hardness of learning, it suffices to  
 544 have an oracle that can sample from  $\mathcal{D}$ , but here we actually explicitly produce a full description of  
 545  $\mathcal{D}$ . Moreover, note that this implicitly implies that the support of  $\mathcal{D}$  is of polynomial size (and hence,  
 546 for any given  $h$ ,  $\text{err}_\gamma^{\mathcal{D}}(h)$  and  $\text{err}_{0-1}^{\mathcal{D}}(h)$  can be efficiently computed).

547 As stated above, Lemma B.2 immediately implies Theorem 3.2 because, if we can agnostically learn  
 548  $\gamma$ -margin halfspaces in time  $f(\frac{1}{\gamma})\text{poly}(d, \frac{1}{\varepsilon})$ , then we can solve  $k$ -Clique in  $f(O(\sqrt{k}))\text{poly}(n)$  time,  
 549 which would imply that  $\text{W}[1]$  is contained in (randomized) FPT. This is formalized below.

550 *Proof of Theorem 3.2.* Suppose that we have an  $f(\frac{1}{\gamma})\text{poly}(d, \frac{1}{\varepsilon})$ -time agnostic learner for  $\gamma$ -margin  
 551 halfspaces. Given an instance  $(G, k)$  of  $k$ -Clique, we run the reduction from Lemma B.2 to produce  
 552 a distribution  $\mathcal{D}$ . We then run the learner on  $\mathcal{D}$  with  $\varepsilon = \frac{0.001}{n^3}$  (and with  $\delta = 1/3$ ). Note that the  
 553 learner runs in time  $f(O(\sqrt{k}))\text{poly}(n)$  and produces a halfspace  $h$ . We then compute  $\text{err}_{0-1}^{\mathcal{D}}(h)$ ; if  
 554 it is no more than  $\kappa + \frac{0.001}{n^3}$ , then we output YES. Otherwise, output NO.

555 The algorithm described above solves  $k$ -Clique (correctly with probability  $2/3$ ) in FPT time. Since  
 556  $k$ -Clique is  $\text{W}[1]$ -complete, this implies that  $\text{W}[1]$  is contained in randomized FPT.  $\square$

557 We now move on to prove Lemma B.2. Before we do so, let us briefly describe the ideas behind it.  
 558 The dimension  $d$  will be set to  $n$ , the number of vertices of  $G$ . Each coordinate  $\mathbf{w}_i$  is associated with  
 559 a vertex  $i \in V(G)$ . In the completeness case, we would like to set  $\mathbf{w}_i = \frac{1}{\sqrt{k}}$  iff  $i$  is in the  $k$ -clique  
 560 and  $\mathbf{w}_i = 0$  otherwise. To enforce a solution to be of this form, we add two types of samples that  
 561 induces the following constraints:

- 562 • *Non-Edge Constraint:* for every non-edge  $(i, j)$ , we should have  $\mathbf{w}_i + \mathbf{w}_j \leq \frac{1}{\sqrt{k}}$ . That is,  
 563 we should “select” at most one vertex among  $i, j$ .
- 564 • *Vertex Selection Constraint:* each coordinate of  $\mathbf{w}$  is at least  $\frac{1}{\sqrt{k}}$ . Note that we will violate  
 565 such constraints for all vertices, except those that are “selected”.

566 If we select the probabilities in  $\mathcal{D}$  so that the non-edge constraints are weighted much larger than the  
 567 vertex selection constraints, then it is always better to not violate any of the first type of constraints.  
 568 When this is the case, the goal will now be to violate as few vertex selection constraints as possible,  
 569 which is the same as finding a maximum clique, as desired.

570 While the above paragraph describes the core idea of the reduction, there are two additional issues  
 571 we have to resolve:

- 572 • *Constant Coordinate:* first, notice that we cannot actually quite write a constraint of the  
 573 form  $\mathbf{w}_i + \mathbf{w}_j \leq \frac{1}{\sqrt{k}}$  using the samples because there is no way to express a value like  $\frac{1}{\sqrt{k}}$   
 574 directly. To overcome this, we have a “constant coordinate”  $\mathbf{w}_*$ , which is supposed to be  
 575 a constant, and replace the right hand side of non-edge constraints by  $\frac{\mathbf{w}_*}{\sqrt{k}}$  (instead of  $\frac{1}{\sqrt{k}}$ ).  
 576 The new constraint can now be represented by a sample.
- 577 • *Margin:* in the above reduction, there was no margin at all! To get the appropriate margin,  
 578 we “shift” the constraint slightly so that there is a margin. For instance, instead of  $\frac{\mathbf{w}_*}{\sqrt{k}}$  for a  
 579 non-edge constraint, we use  $\frac{1.1\mathbf{w}_*}{\sqrt{k}}$ . We now have a margin of  $\approx \frac{0.1}{\sqrt{k}}$  and it is still possible  
 580 to argue that the best solution is still to select a clique.

581 The reduction, which follows the above outline, is formalized below.

582 *Proof of Lemma B.2.* Given a graph  $G = (V, E)$ , we use  $n$  to denote the number of vertices  $|V|$  and  
 583 we rename its vertices so that  $V = [n]$ . We set  $d = n + 1$ ; we name the first coordinate  $*$  and each of  
 584 the remaining coordinates  $i \in [n]$ . For brevity, let us also define  $\beta = 1 - \frac{0.01}{n^2}$ . The distribution  $\mathcal{D}$  is  
 585 defined as follows:

- 586 • Add a labeled sample  $(-\mathbf{e}^*, -1)$  with probability  $\frac{\beta}{2}$  in  $\mathcal{D}$ . We refer to this as the *positivity*  
 587 *constraint for  $*$* .
- 588 • For every pair of distinct vertices  $i, j$  that do not induce an edge in  $E$ , add a labeled sample  
 589  $(\frac{1}{2}(\frac{1.1}{\sqrt{k}}\mathbf{e}^* - \mathbf{e}^i - \mathbf{e}^j), 1)$  with probability  $\frac{\beta}{2\binom{n}{2}-|E|}$  in  $\mathcal{D}$ . We refer to this as the *non-edge*  
 590 *constraint for  $(i, j)$* .
- 591 • For every vertex  $i$ , add a labeled sample  $(\frac{1}{2}(\mathbf{e}^i - \frac{0.9}{\sqrt{k}}\mathbf{e}^*), 1)$  with probability  $\frac{0.01}{n^3}$  in  $\mathcal{D}$ .  
 592 We refer to this as the *vertex selection constraint for  $i$* .

593 Finally, let  $\gamma = \frac{0.1}{2\sqrt{2k}}$ ,  $\kappa = (n - k) \left(\frac{0.01}{n^3}\right)$ . It is obvious that the reduction runs in polynomial time.

594 **Completeness.** Suppose that  $G$  contains a  $k$ -clique; let  $S \subseteq V$  denote the set of its vertices. We  
 595 define  $\mathbf{w}$  by  $\mathbf{w}_* = \frac{1}{\sqrt{2}}$  and, for every  $i \in V$ ,  $\mathbf{w}_i = \frac{1}{\sqrt{2k}}$  if  $i \in S$  and  $\mathbf{w}_i = 0$  otherwise. It is clear that  
 596  $\|\mathbf{w}\|_2 = 1$  and that, for every  $(\mathbf{x}, y) \in \text{supp}(\mathcal{D})$ , we have  $|\langle \mathbf{w}, \mathbf{x} \rangle| \geq \frac{0.1}{2\sqrt{2k}}$ . Finally, observe that all  
 597 the first two types of constraints are satisfied, and a vertex selection constraint for  $i$  is unsatisfied iff  
 598  $i \notin S$ . Thus, we have  $\text{err}_\gamma^\mathcal{D}(\mathbf{w}) = (n - k) \left(\frac{0.01}{n^3}\right) = \kappa$ , which implies that  $\text{OPT}_\gamma^\mathcal{D} \leq \kappa$  as desired.

599 **Soundness.** Suppose contrapositively that  $\text{OPT}_{0-1}^\mathcal{D} \leq \kappa + \frac{0.001}{n^3}$ ; that is, there exists  $\mathbf{w}$  such that  
 600  $\text{err}_{0-1}^\mathcal{D}(\mathbf{w}) \leq \kappa + \frac{0.001}{n^3}$ . Observe that each labeled sample of the first two types of constraints has  
 601 probability more than  $\frac{\beta}{2n^2} > \kappa + \frac{0.001}{n^3}$ . As a result,  $\mathbf{w}$  must correctly classify these samples. Since  
 602  $\mathbf{w}$  correctly classifies  $(-\mathbf{e}^*, -1)$ , it must be that  $w_* > 0$ .

603 Now, let  $T$  be the set of vertices  $i$  such that  $\mathbf{w}$  mislabels the vertex selection constraint for  $i$ . Observe  
 604 that  $|T| < \frac{\kappa + \frac{0.001}{n^3}}{\frac{0.01}{n^3}} < n - k + 1$ . In other words,  $S := V \setminus T$  is of size at least  $k$ . We claim that  $S$   
 605 induces a  $k$ -clique in  $G$ . To see that this is true, consider a pair of distinct vertices  $i, j \in S$ . Since  $\mathbf{w}$   
 606 satisfies the vertex selection constraints for  $i$  and for  $j$ , we must have  $\mathbf{w}_i, \mathbf{w}_j \geq \frac{0.9}{\sqrt{k}}$ . This implies  
 607 that  $(i, j)$  is an edge, as otherwise  $\mathbf{w}$  would mislabel the non-edge constraint for  $(i, j)$ .

608 As a result,  $G$  contains a  $k$ -clique as desired. □

### 609 B.3 Reduction from $k$ -CSP and Proofs of Theorems 3.1, 3.3 and Lemma B.1

610 In this section, we will prove Theorems 3.1 and 3.3, by reducing from the hardness of approximation  
 611 of constraint satisfaction problems (CSPs), given by PCP Theorems.

#### 612 B.3.1 CSPs and PCP Theorem(s)

613 Before we can state our reductions, we have to formally define CSPs and state the PCP theorems we  
 614 will use more formally. We start with the definition of  $k$ -CSP:

615 **Definition B.3 ( $k$ -CSP).** For any integer  $k \in \mathbb{N}$ , a  $k$ -CSP instance  $\mathcal{L} = (V, \Sigma, \{\Pi_q\}_{q \in \mathcal{Q}})$  consists of

- 616 • The variable set  $V$ ,
- 617 • The alphabet  $\Sigma$ , which we sometimes refer to as labels,
- 618 • Constraints set  $\{\Pi_S\}_{S \in \mathcal{Q}}$ , where  $\mathcal{Q} \subseteq \binom{V}{k}$  is a collection of  $k$ -size subset of  $V$ . For each  
 619 subset  $S = \{v_1, \dots, v_k\}$ ,  $\Pi_S \subseteq \Sigma^S$  is the set of accepting answers for the constraint  $\Pi_S$ .  
 620 Here we think of each  $f \in \Sigma^S$  as a function from  $f : S \rightarrow \Sigma$ .

621 A  $k$ -CSP instance is said to be *regular* if each variable appears in the same number of constraints.

622 An assignment  $\phi$  is a function  $\phi : V \rightarrow \Sigma$ . Its value, denoted by  $\text{val}_{\mathcal{L}}(\phi)$ , is the fraction of constraints  
623  $S \in \mathcal{Q}$  such that<sup>4</sup>  $\phi|_S \in \Pi_S$ . Such constraints are said to be *satisfied* by  $\phi$ . The value of  $\mathcal{L}$ , denoted  
624 by  $\text{val}(\mathcal{L})$ , is the maximum value among all assignments, i.e.,  $\text{val}(\mathcal{L}) := \max_{\phi} \text{val}_{\mathcal{L}}(\phi)$ .

625 In the  $\nu$ -GAP- $k$ -CSP problem, we are given a regular instance  $\mathcal{L}$  of  $k$ -CSP, and we want to distinguish  
626 between  $\text{val}(\mathcal{L}) = 1$  and  $\text{val}(\mathcal{L}) < \nu$ .

627 Throughout this subsection, we use  $n$  to denote the instance size of  $k$ -CSP, that is  $n = \sum_{S \in \mathcal{Q}} |\Pi_S|$ .

628 The celebrated PCP theorem [AS98, ALM<sup>+</sup>98] is equivalent to the proof of NP-hardness of approxi-  
629 mating  $\nu$ -Gap- $k$ -CSP for some constant  $k$  and  $\nu < 1$ . Since we would like to prove (tight) running  
630 time lower bounds, we need the versions of PCP Theorems that provides strong running time lower  
631 bounds as well. For this task, we turn to the Moshkovitz-Raz PCP theorem, which can not only  
632 achieve arbitrarily small constant  $\nu > 0$  but also almost exponential running time lower bound.

633 **Theorem B.4** (Moshkovitz-Raz PCP [MR10]). *Assuming ETH, for any  $0 < \nu < 1$ ,  $\nu$ -Gap-2-CSP*  
634 *cannot be solved in time  $O(2^{n^{1-o(1)}})$ , even for instances with  $|\Sigma| = O_{\nu}(1)$ .*

635 As for our hardness of approximation result (Theorem 3.3), we are aiming to get as large a ratio as  
636 possible. For this purpose, we will use a PCP Theorem of Dinur, Harsha and Kindler, which achieves  
637  $\nu = \frac{1}{\text{poly}(n)}$  but need  $k$  to be polyloglog( $n$ ).

638 **Theorem B.5** (Dinur-Harsha-Kindler PCP [DHK15]).  *$n^{-\Omega(1)}$ -Gap-polyloglog( $n$ )-CSP is NP-hard.*

639 Finally, we state the Sliding Scale Conjecture (SSC) of Bellare et al. [BGLR94], which says that the  
640 NP-hardness with  $\nu = \frac{1}{\text{poly}(n)}$  holds even in the case where  $k$  is constant:

641 **Conjecture 1** (Sliding Scale Conjecture [BGLR94]). *For some constant  $k$ ,  $n^{-\Omega(1)}$ -Gap- $k$ -CSP is*  
642 *NP-hard.*

### 643 B.3.2 Reducing from $k$ -CSP to Agnostically Learning Halfspaces with Margin

644 Having set up the notation, we now move on to the reduction from  $k$ -CSP to agnostic learning of half-  
645 spaces with margin. Our reduction can be viewed as a modification of the reduction from [ABSS97];  
646 compared to [ABSS97], we have to (1) be more careful so that we can get the margin in the com-  
647 pleteness and (2) modify the reduction to work even for  $k > 2$ .

648 Before we precisely state the formal properties of the reduction, let us give a brief informal intuition  
649 behind the reduction. Given an instance  $\mathcal{L} = (V, \Sigma, \{\Pi_S\}_{S \in \mathcal{Q}})$  of  $k$ -CSP, we will create a distribution  
650  $\mathcal{D}$  on  $\mathbb{B}_d \times \{\pm 1\}$ , where the dimension  $d$  is equal to  $n$ . Each coordinate is associated with an  
651 accepting answer of each constraint; that is, each coordinate is  $(S, f)$  where  $S \in \mathcal{Q}$  and  $f \in \Pi_S$ . In  
652 the completeness case where we have a perfect assignment  $\phi$ , we would like the halfspace's normal  
653 vector to set  $\mathbf{w}_{(S,f)} = 1$  iff  $f$  is the assignment to predicate  $S$  in  $\phi$  (i.e.,  $f = \phi|_S$ ), and zero otherwise.  
654 To enforce this, we add three types of constraints:

- 655 • *Non-negativity Constraint*: that each coordinate of  $\mathbf{w}$  should be non-negative.
- 656 • *Satisfiability Constraint*: that for each  $S \in \mathcal{Q}$ ,  $\mathbf{w}_{(S,f)}$  is positive for at least one  $f \in \Pi_S$ .
- 657 • *Selection Constraint*: for each variable  $v \in V$  and label  $\sigma \in \Sigma$ , we add a constraint that the  
658 sum of all  $\mathbf{w}_{(S,f)}$ , for all  $S$  that  $v$  appears in and all  $f$  that assigns  $\sigma$  to  $v$ , is non-positive.

659 Notice that, for the completeness case, we satisfy the first two types of constraints, and we violate the  
660 selection constraints only when  $\phi(v) = \sigma$ . Intuitively, in the soundness case, we will not be able to  
661 “align” the positive  $\mathbf{w}_{(S,f)}$  from different  $S$ 's together, and we will have to violate a lot more selection  
662 constraints.

663 Of course, there are many subtle points that the above sketch does not address, such as the margin; on  
664 this front, we add one more special coordinate  $\mathbf{w}_*$ , which we think of as being equal to 1, and we  
665 add/subtract  $\delta$  times this coordinate to each of the constraints, which will create the margin for us.  
666 Another issue is that the normal vector of the halfspace (and samples) as above have norm more than  
667 one. Indeed, our assignment in the completeness case has norm  $O(\sqrt{n})$ . Hence, we have to scale the

<sup>4</sup>We use  $\phi|_S$  to denote the restriction of  $\phi$  on the domain  $S$ .



normal vector down by a factor of  $O(\sqrt{n})$ , which results in a margin of  $\gamma = \Omega(1/\sqrt{n})$ . This is the reason why we arrive at the running time lower bound of the form  $2^{\gamma^{2-o(1)}}$ .

The properties and parameter dependencies of the reduction are encapsulated in the following theorem.

**Theorem B.6.** *There exists a polynomial time reduction that takes as input a regular instance  $\mathcal{L} = (V, \Sigma, \{\Pi_S\}_{S \in \mathcal{Q}})$  of  $k$ -CSP and a real number  $\nu > 0$ , and produces a distribution  $\mathcal{D}$  over  $\mathbb{B}_d \times \{\pm 1\}$  and positive real numbers  $\gamma, \kappa, \varepsilon, \alpha$  such that*

- (Completeness) If  $\mathcal{L}$  is satisfiable, then  $\text{OPT}_\gamma^\mathcal{D} \leq \kappa$ .
- (Soundness) If  $\text{val}(\mathcal{L}) < \nu$ , then  $\text{OPT}_{0-1}^\mathcal{D} > \alpha \cdot \kappa + \varepsilon$ .
- (Margin Parameter)  $\gamma = \Omega\left(\frac{1}{\Delta|\Sigma|^{3k}\sqrt{|\mathcal{Q}|}}\right)$ , where  $\Delta$  denotes the number of constraints each variable appears in.
- (Approximation Ratio)  $\alpha = \Omega\left(\frac{(1/\nu)^{1/k}}{k}\right)$ .
- (Error Parameter)  $\varepsilon = \Omega\left(\frac{1}{\Delta|\Sigma|^k}\right) \cdot \alpha$ .
- (Dimension)  $d = n + 1$ .

*Proof.* Before we define  $\mathcal{D}$ , let us specify the parameters:

- First, we let  $d$  be  $1 + n$ . We name the first coordinate as  $*$  and each of the remaining coordinates are named  $(S, f)$  for a constraint  $S \in \mathcal{Q}$  and  $f \in \Pi_S$ .
- Let  $Z := 2(|V| \cdot |\Sigma| + 2k|\mathcal{Q}| + 2k \sum_{e \in E} |\Pi_e|)$  be our “normalizing factor”, which will be used below to normalize the probability.
- Let  $\delta := \frac{0.1}{\Delta|\Sigma|^{2k}}$  be the “shift parameter”. Note that this is not the margin  $\gamma$  (which will be defined below).
- Let  $s := 10\Delta|\Sigma|^k$  be the scaling factor, which we use to make sure that all our samples lie within the unit ball.
- Let the gap parameter  $\alpha$  be  $\frac{(1/\nu)^{1/k}}{40k}$ .
- Finally, let  $\kappa = \frac{|V|}{Z}$  and  $\varepsilon = \kappa \cdot \alpha$ .

Note that  $\alpha$  as defined above can be less than one. However, this is not a problem: in the subsequent proofs of Theorems 3.1 and 3.3, we will always choose the settings of parameters so that  $\alpha > 1$ .

We are now ready to define the distribution  $\mathcal{D}$  on  $\mathbb{B}_d \times \{\pm 1\}$ , as follows:

1. Add a labeled sample  $(-\mathbf{e}^*, -1)$  with probability  $1/2$  to  $\mathcal{D}$ . This corresponds to the constraint  $\mathbf{w}_* > 0$ ; we refer to this as the *positivity constraint for  $*$* .
2. Next, for each coordinate  $(S, f)$ , add a labeled sample  $(\frac{1}{s}(\mathbf{e}^{(S,f)} + \delta \cdot \mathbf{e}^*), 1)$  with probability  $2k/Z$  to  $\mathcal{D}$ . This corresponds to  $\mathbf{w}_{(S,f)} + \delta \cdot \mathbf{w}_* \geq 0$  scaled down by a factor of  $1/s$  so that the vector is in the unit ball; we refer to this as the *non-negativity constraint for  $(S, f)$* .
3. For every  $S \in \mathcal{Q}$ , add a labeled sample  $(\frac{1}{s}(\sum_{f \in \Pi_S} \mathbf{e}^{(S,f)} - (1 - \delta)\mathbf{e}^*), 1)$  with probability  $2k/Z$  to  $\mathcal{D}$ . This corresponds to the constraint  $\sum_{f \in \Pi_S} \mathbf{w}_{(S,f)} \geq (1 - \delta)\mathbf{w}_*$ , scaled down by a factor of  $1/s$ . We refer to this constraint as the *satisfiability constraint for  $S$* .

704 4. For every variable  $v \in V$  and  $\sigma \in \Sigma$ , add a labeled sample  
705  $\left(\frac{1}{s} \left( \sum_{S \in \mathcal{Q}: v \in S} \sum_{f \in \Pi_S: f(v)=\sigma} \mathbf{e}^{(S,f)} - \delta \mathbf{e}^* \right), -1\right)$  with probability  $1/Z$  to  $\mathcal{D}$ . This cor-  
706 responds to the constraint  $\sum_{S \in \mathcal{Q}: v \in S} \sum_{f \in \Pi_S: f(v)=\sigma} \mathbf{w}_{(S,f)} < \delta \cdot \mathbf{w}_*$ , scaled down by a  
707 factor of  $1/s$ . We refer to this as the *selection constraint* for  $(v, \sigma)$ .

708 **Completeness.** Suppose that there exists an assignment  $\phi : V \rightarrow \Sigma$  that satisfies all the constraints  
709 of  $\mathcal{L}$ . Consider the halfspace with normal vector  $\mathbf{w}$  defined by  $\mathbf{w}_* = \zeta$  and

$$\mathbf{w}_{(S,f)} = \begin{cases} \zeta & \text{if } f = \phi|_S, \\ 0 & \text{otherwise,} \end{cases}$$

710 where  $\zeta := \frac{1}{\sqrt{1+|\mathcal{Q}|}}$  is the normalization factor. It is easy to see that the positivity constraints and the  
711 satisfiability constraints are satisfied with margin at least  $\gamma = \zeta \cdot \delta/s = \Omega\left(\frac{1}{\Delta|\Sigma|^{3k}\sqrt{|\mathcal{Q}|}}\right)$ . Finally,  
712 observe that the sum  $\sum_{S \in \mathcal{Q}: v \in S} \sum_{f \in \Pi_S: f(v)=\sigma} \mathbf{w}_{(S,f)}$  is zero if  $f(v) \neq \sigma$ ; in this case, the selection  
713 constraint for  $(v, \sigma)$  is also satisfied with margin at least  $\gamma$ . As a result, we only incur an error  
714 (with respect to margin  $\gamma$ ) for the selection constraint for  $(v, \phi(v))$  for all  $v \in V$ ; hence, we have  
715  $\text{err}_\gamma^{\mathcal{D}}(\mathbf{w}) \leq \frac{1}{Z} \cdot |V| = \kappa$  as desired.

716 **Soundness.** Suppose contrapositively that there exists  $\mathbf{w}$  with  $\text{err}_{0-1}^{\mathcal{D}}(\mathbf{w}) \leq \alpha \cdot \kappa + \varepsilon = 2\alpha\kappa$ . We  
717 will “decode” back an assignment with value at least  $\nu$  of the CSP from  $\mathbf{w}$ .

718 To do so, first observe that from the positivity constraint for  $*$ , we must have  $\mathbf{w}_* > 0$ , as otherwise  
719 we would already incur an error of  $1/2 > 2\alpha\kappa$  with respect to  $\mathcal{D}$ . Now, since scaling (by a positive  
720 factor) does not change the fraction of samples violated, we may assume w.l.o.g. that  $\mathbf{w}_* = 1$ .

721 Next, we further claim that we may assume without loss of generality that  $\mathbf{w}$  does not violate any  
722 non-negativity constraints (2) or satisfiability constraints (3). The reason is that, if  $\mathbf{w}$  violates a  
723 non-negativity constraint for  $(S = \{v_1, \dots, v_k\}, f)$ , then we may simply change  $\mathbf{w}_{(S,f)}$  to zero. This  
724 reduces the error by  $2k/Z$ , while it may only additionally violate  $k$  additional selection constraints for  
725  $(v_1, f(v_1)), \dots, (v_k, f(v_k))$  which weights  $k/Z$  in total with respect to  $\mathcal{D}$ . As a result, this change  
726 only reduces the error in total. Similarly, if the satisfiability constraint of  $S$  is unsatisfied, we may  
727 change  $\mathbf{w}_{(S,f)}$  for some  $f \in \Pi_S$  to a sufficiently large number so that this constraint is satisfied; once  
728 again, in total the error decreases. Hence, we may assume that the non-negativity constraints (2) and  
729 satisfiability constraints (3) all hold.

730 Now, for every vertex  $v$ , let  $L_v \subseteq \Sigma$  denote the set of labels  $\sigma \in \Sigma$  such that the selection constraint  
731 for  $(v, \sigma)$  is violated. Since we assume that  $\text{err}_{0-1}^{\mathcal{D}}(\mathbf{w}) \leq 2\alpha\kappa$ , we must have  $\sum_{v \in V} |L_v| \leq$   
732  $(2\alpha\kappa)/(1/Z) = 2\alpha|V|$ .

733 Next, let  $V_{\text{small}}$  denote the set of all variables  $v \in V$  such that  $|L_v| \leq 20\alpha k$ . From the bound we just  
734 derived, we must have  $|V_{\text{small}}| \geq (1 - \frac{1}{10k})|V|$ .

735 Another ingredient we need is the following claim:

736 **Claim B.7.** *For every constraint  $S = \{v_1, \dots, v_k\} \in \mathcal{Q}$ , there exist  $\sigma_1 \in L_{v_1}, \dots, \sigma_k \in L_{v_k}$  that*  
737 *induces an accepting assignment for  $\Pi_S$  (i.e.,  $f \in \Pi_S$  where  $f$  is defined by  $f(v_i) = \sigma_i$ ).*

738 *Proof.* Suppose for the sake of contradiction that no such  $\sigma_1 \in L_{v_1}, \dots, \sigma_k \in L_{v_k}$  exists. In other  
739 words, for every  $f \in \Pi_S$ , there must exist  $i \in [k]$  such that the selection constraint for  $(v_i, f(v_i))$  is  
740 not violated. This means that

$$\begin{aligned} \delta &= \delta \cdot \mathbf{w}_* > \sum_{S' \in \mathcal{Q}: v \in S'} \sum_{f' \in \Pi_{S'}: f'(v)=\sigma} \mathbf{w}_{(S',f')} \\ &\geq \mathbf{w}_{(S,f)} + \sum_{S' \in \mathcal{Q}: v \in S'} \sum_{f' \in \Pi_{S'}: f'(v)=\sigma} -\delta \cdot \mathbf{w}_* \\ &\geq \mathbf{w}_{(S,f)} - \delta \cdot \Delta|\Sigma|^k \end{aligned}$$

741 where the second inequality comes from our assumption, that the non-negativity constraints are  
742 satisfied.

743 Hence, by summing this up over all  $f \in \Pi_S$ , we get

$$\sum_{f \in \Pi_S} \mathbf{w}_{(S,f)} \leq \delta \cdot (\Delta |\Sigma|^k + 1) \cdot |\Sigma|^k < (1 - \delta),$$

744 which means that the satisfiability constraint for  $S$  is violated, a contradiction.  $\square$

745 We can now define an assignment  $\phi : V \rightarrow \Sigma$  for  $\mathcal{L}$  as follows. For every  $v \in V$ , let  $\phi(v)$  be a random  
746 label in  $L_v$ . Notice here that, by Claim B.7, the probability that a constraint  $S = \{v_1, \dots, v_k\}$  is  
747 satisfied is at least  $\prod_{i \in [k]} |L_{v_i}|^{-1}$ . Hence, the expected total number of satisfied constraints is at least

$$\begin{aligned} \sum_{S=\{v_1, \dots, v_k\} \in \mathcal{Q}} \prod_{i \in [k]} |L_{v_i}|^{-1} &\geq \sum_{S=\{v_1, \dots, v_k\} \in \mathcal{Q}: v_1, \dots, v_k \in V_{\text{small}}} \prod_{i \in [k]} |L_{v_i}|^{-1} \\ &\geq \sum_{S=\{v_1, \dots, v_k\} \in \mathcal{Q}: v_1, \dots, v_k \in V_{\text{small}}} (20\alpha k)^{-k}. \end{aligned}$$

748 Recall that we have earlier bound  $|V_{\text{small}}|$  to be at least  $(1 - \frac{1}{10k})|V|$ . Hence, the fraction of  
749 constraints that involves some variable outside of  $V_{\text{small}}$  is at most  $(\frac{1}{10k}) \cdot (k) = 0.1$ . Plugging this  
750 into the above inequality, we get that the expected total number of satisfied constraints is at least

$$0.9|\mathcal{Q}| \cdot (20\alpha k)^{-k} > |\mathcal{Q}| \cdot \nu,$$

751 where the equality comes from our choice of  $\alpha$ . In other words, we have  $\text{val}(\mathcal{L}) > \nu$  as desired.  $\square$

### 752 B.3.3 Proofs of Theorems 3.1, 3.3 and Lemma B.1

753 We now prove Theorem 3.1, by simply applying Theorem B.6 with appropriate parameters on top of  
754 the Moshkovitz-Raz PCP.

755 *Proof of Theorem 3.1.* Suppose contrapositively that, for some constant  $\tilde{\alpha} \geq 1$  and  $\zeta > 0$ , we have  
756 an  $O(2^{(1/\gamma)^{2-\zeta}} 2^{d^{1-\zeta}}) f(\frac{1}{\varepsilon})$  time  $\tilde{\alpha}$ -agnostic proper learner for  $\gamma$ -margin halfspaces.

757 Let  $\nu > 0$  be a sufficiently small constant so that the parameter  $\alpha$  (when  $k = 2$ ) from Theorem B.6 is  
758 at least  $\tilde{\alpha}$ . (In particular, we pick  $\nu = \frac{1}{C(\tilde{\alpha})^k}$  for some sufficiently large constant  $C$ .)

759 Given an instance  $\mathcal{L}$  of  $\nu$ -Gap-2-CSP, we run the reduction from Theorem B.6 to produce a distribution  
760  $\mathcal{D}$ . We then run the learner on  $\mathcal{D}$  with error parameter  $\varepsilon$  as given by Theorem B.6 (and with  $\delta = 1/3$ ).  
761 Note that the learner runs in  $O(2^{(1/\gamma)^{2-\zeta}} 2^{d^{1-\zeta}}) f(\frac{1}{\varepsilon}) = 2^{O(n^{1-\zeta/2})}$  time, and produces a halfspace  $h$ .  
762 We compute  $\text{err}_{0-1}^{\mathcal{D}}(h)$ ; if it is no more than  $\alpha \cdot \kappa + \varepsilon$ , then we output YES. Otherwise, output NO.

763 The algorithm describe above solves  $\nu$ -Gap-2-CSP (correctly with probability  $2/3$ ) in  $2^{O(n^{1-\zeta/2})}$   
764 time, which, by Theorem B.4, violates (randomized) ETH.  $\square$

765 Next, we prove Lemma B.1. The main difference from the above proof is that, since the algorithm  
766 works only for *some* margin  $\gamma = \gamma(d)$ . We will select the dimension  $d$  to be as large as possible so  
767 that  $\gamma(d)$  is still smaller than the margin given by Theorem B.6. This dimension  $d$  will be larger than  
768 the dimension given by Theorem B.6; however, this is not an issue since we can simply “pad” the  
769 remaining dimensions by setting the additional coordinates to zeros. This is formalized below.

770 *Proof of Lemma B.1.* Let  $\tilde{\alpha} \geq 1$  be any constant. Let  $\nu > 0$  be a sufficiently small constant so that  
771 the parameter  $\alpha$  (when  $k = 2$ ) from Theorem B.6 is at least  $\tilde{\alpha}$ . (In particular, we pick  $\nu = \frac{1}{C(\tilde{\alpha})^k}$  for  
772 some sufficiently large constant  $C$ .) Let  $\varepsilon_0 = \varepsilon_0(\tilde{\alpha})$  be the parameter  $\varepsilon$  given by Theorem B.6.

773 Suppose contrapositively that, for some  $\zeta > 0$ , there is an  $\tilde{\alpha}$ -agnostic learner  $\mathcal{A}$  for  $\gamma(\tilde{d})$ -margin  
774 halfspaces that runs in time  $O(2^{(1/\gamma)^{2-\zeta}}) \text{poly}(\tilde{d})$  for all dimensions  $\tilde{d}$  and for some  $0 < \varepsilon^* < \varepsilon_0(\alpha)$   
775 and  $\gamma(\tilde{d})$  that satisfies

$$\frac{1}{\tilde{d}^{0.5-\zeta}} \leq \gamma(\tilde{d}) \leq \frac{1}{(\log \tilde{d})^{0.5+\zeta}} \quad (4)$$

776 and

$$\frac{\gamma(\tilde{d} + 1)}{\gamma(\tilde{d})} \geq \zeta. \quad (5)$$

777 We may assume without loss of generality that  $\zeta < 0.1$ .

778 We create an algorithm  $\mathcal{B}$  for  $\nu$ -Gap-2-CSP as follows:

- 779 • Given an instance  $\mathcal{L}$  of  $\nu$ -Gap-2-CSP of size  $n$ , we first run the reduction from Theorem B.6  
780 with  $\nu$  as selected above to produce a distribution  $\mathcal{D}$  on  $\mathbb{B}_d \times \{\pm 1\}$  (where  $d = n + 1$ ). Let  
781 the margin parameter  $\gamma$  be as given in Theorem B.6; observe that  $\gamma = \Omega_\nu(1/\sqrt{n})$ .
- 782 • Let  $\tilde{d}$  be the largest integer so that  $\gamma(\tilde{d}) \geq \gamma$ . Observe that, from the lower bound in (5),  
783 we have  $\gamma(d) \geq \frac{1}{d^{0.5-\zeta}}$ . Hence, for a sufficiently large  $d$ ,  $\gamma(d)$  is larger than  $\gamma$  (which is  
784  $O_\nu(1/\sqrt{d})$ ). In other words, we have  $\tilde{d} \geq d$ .
- 785 • Create a distribution  $\mathcal{D}'$  as follows: for each  $(\mathbf{x}, y) \in \text{supp}(\mathcal{D})$ , we create a sample  $(\mathbf{x}', y)$   
786 in  $\mathcal{D}'$  with the same probability and where  $\mathbf{x}' \in \mathbb{B}_{\tilde{d}}$  is  $\mathbf{x}$  concatenated with 0s in the last  
787  $\tilde{d} - d$  coordinates.
- 788 • Run the learner  $\mathcal{A}$  on  $\mathcal{D}'$  with parameter  $\gamma(\tilde{d})$  and  $\varepsilon$ . Suppose that it outputs a halfspace  $h$ .  
789 We compute  $\text{err}_{0-1}^{\mathcal{D}'}(h)$ ; if this is no more than  $\alpha \cdot \kappa + \varepsilon_0(\alpha)$ , then output YES. Otherwise,  
790 output NO.

791 It is simple to see that, in the completeness case, we must have  $\text{OPT}_{\gamma(\tilde{d})}^{\mathcal{D}'} \leq \text{OPT}_{\gamma}^{\mathcal{D}'} = \text{OPT}_{\gamma}^{\mathcal{D}} \leq \kappa$ ;  
792 hence,  $\mathcal{A}$  would (with probability  $2/3$ ) output a halfspace  $h$  with 0-1 error at most  $\alpha \cdot \kappa + \varepsilon_0(\alpha)$ , and we  
793 output YES. On the other hand, in the soundness case, we have  $\text{OPT}_{0-1}^{\mathcal{D}'} = \text{OPT}_{0-1}^{\mathcal{D}'} > \alpha \cdot \kappa + \varepsilon_0(\tilde{\alpha})$ ,  
794 and we always output NO. Hence, the algorithm is correct with probability  $2/3$ .

795 Next, to analyze the running time of  $\mathcal{B}$ , let us make a couple additional observations. First, from (5),  
796 we have

$$\gamma(\tilde{d}) \leq \gamma/\zeta \leq O(1/\sqrt{n}). \quad (6)$$

797 Furthermore, from the upper bound in (5), we have

$$\tilde{d} \leq 2^{(1/\gamma(\tilde{d}))^{\frac{1}{0.5+\zeta}}} \leq 2^{O(n^{\frac{1}{1+2\zeta}})} \leq 2^{O(n^{1-\zeta})}, \quad (7)$$

798 where the last inequality follows from  $\zeta < 0.1$ .

799 As a result, the algorithm runs in time  $O(2^{(1/\gamma(d))^{2-\zeta}})\text{poly}(\tilde{d}) \leq 2^{O(n^{1-\zeta/2})}$ , which from Theo-  
800 rem B.4 would break the (randomized) ETH.  $\square$

801 Finally, we prove Theorem 3.3, which is again by simply applying Theorem B.6 to the Dinur-Harsha-  
802 Kindler PCP and the Sliding Scale Conjecture.

803 *Proof of Theorem 3.3.* By plugging in our reduction from Theorem 3.3 to Theorem B.5, we get  
804 that it is NP-hard to, given a distribution  $\mathcal{D}$ , distinguish between  $\text{OPT}_{\gamma}^{\mathcal{D}} \leq \kappa$  or  $\text{OPT}_{0-1}^{\mathcal{D}} >$   
805  $\alpha \cdot \kappa + \Omega(\frac{1}{\text{poly}(d)})$  where  $\gamma = \frac{1}{d^{\text{polyloglog}(d)}}$  and  $\alpha = d^{1/\text{polyloglog}(d)} = (1/\gamma)^{1/\text{polyloglog}(1/\gamma)}$ . In other  
806 words, if we have a polynomial time  $\alpha$ -agnostic learner for  $\gamma$ -margin halfspaces for this regime of  
807 parameter, then  $\text{NP} = \text{RP}$ .

808 Similarly, by plugging in our reduction the Sliding Scale Conjecture, we get that it is NP-hard to,  
809 given a distribution  $\mathcal{D}$ , distinguish between  $\text{OPT}_{\gamma}^{\mathcal{D}} \leq \kappa$  or  $\text{OPT}_{0-1}^{\mathcal{D}} > \alpha \cdot \kappa + \Omega(\frac{1}{\text{poly}(d)})$  where  
810  $\gamma = 1/d^{O(1)}$  and  $\alpha = d^{\Omega(1)} = (1/\gamma)^{\Omega(1)}$ . In other words, if we have a polynomial time  $\alpha$ -agnostic  
811 learner for  $\gamma$ -margin halfspaces for this regime of parameter, then  $\text{NP} = \text{RP}$ .  $\square$
